# Supplementary material for: A Fast HPLC/UV Method for Determination of Ketoprofen in Cellular Media
Source: PubMed Central journal article supplement (PMC10924040; doi:10.1002/open.202300147), 2023-11-13
Supplement: OPEN-13-e202300147-s001.pdf [file OPEN-13-e202300147-s001.pdf]

# ChemistryOpen

Supporting Information

## **A Fast HPLC/UV Method for Determination of Ketoprofen in Cellular Media**

Oleksandra Vozniuk, Zdeněk Kejík, Kateřina Veselá, Markéta Skaličková, Petr Novotný, Róbert Hromádka, Jan Hajduch, Pavel Martásek, and Milan Jakubek\*

**Context:**

**Figure S1.** Overlay of ketoprofen calibration curve chromatograms measured in used media.

**Table S1.** Comparison of different methods for the determination of ketoprofen.

**Table S2.** Detailed table of data for evaluation of the precision of the developed method.

**Table S3.** Comparison of the composition of used media.

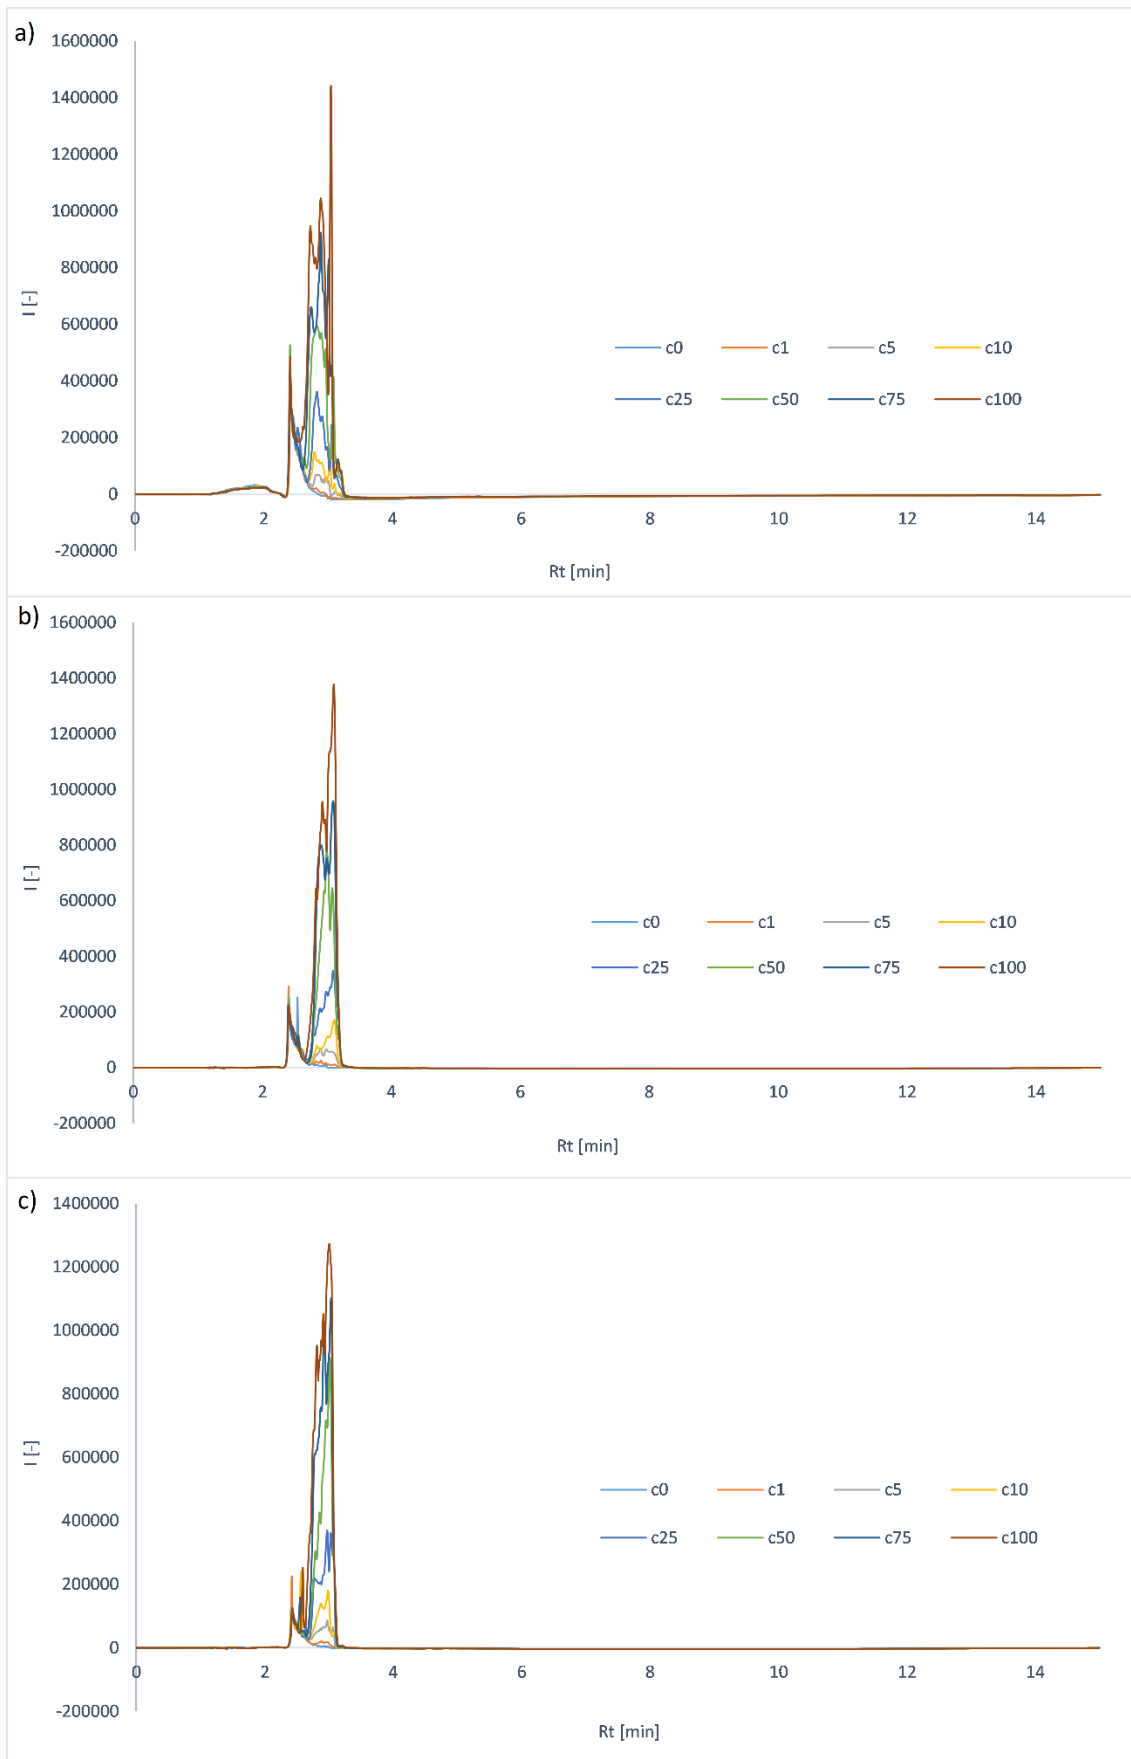

**Figure S1.** Overlay of ketoprofen calibration curve chromatograms measured in (a) DMEM, (b) EMEM, (c) RPMI

**Table S1.** Comparison of different methods for the determination of ketoprofen

| Name of the method            | Sample preparation                                                                                                                                                                                                                                                                                                                                                                                                                          | Conduction of the experiment                                                                                                                                                                                                                                                                                                                                                                                                                                                                                                                             | Application                                                                                                                                                                                                                                      |
|-------------------------------|---------------------------------------------------------------------------------------------------------------------------------------------------------------------------------------------------------------------------------------------------------------------------------------------------------------------------------------------------------------------------------------------------------------------------------------------|----------------------------------------------------------------------------------------------------------------------------------------------------------------------------------------------------------------------------------------------------------------------------------------------------------------------------------------------------------------------------------------------------------------------------------------------------------------------------------------------------------------------------------------------------------|--------------------------------------------------------------------------------------------------------------------------------------------------------------------------------------------------------------------------------------------------|
| Gas chromatography [1]        | 100 $\mu\text{L}$ of 2-(4-benzoylphenyl)butanoic acid (internal standard), 0.4 mL of 0.2 M tetrabutylammonium hydroxide solution and 3 mL of 1.1 M iodomethane solution in $\text{CH}_2\text{Cl}_2$ were added to 400 $\mu\text{L}$ of plasma containing ketoprofen. The mixture was stirred for 70 min to allow methylation to occur. Subsequently, the organic layer was evaporated and the dry residue was dissolved in 1 mL of toluene. | The separation took place on a glass column filled with 3% OV-17. The temperature of the injector was set to 250 $^\circ\text{C}$ , in the thermostat to 225 $^\circ\text{C}$ . Nitrogen was used as carrier gas with a flow rate of 30 ml/min. The injection was 1-3 $\mu\text{L}$ of the sample. The $^{63}\text{Ni}$ electron capture detector was heated to 240 $^\circ\text{C}$ to achieve the lowest possible detection limit.                                                                                                                     | This method is suitable for the determination of ketoprofen in plasma down to 0.5 $\mu\text{M}$ , but requires time-consuming extractive methylation of ketoprofen and the internal standard.                                                    |
| Capillary electrophoresis [2] | 200 $\mu\text{L}$ of acetonitrile containing 10 mg/L isobutylmethylxanthine (internal standard) was added to 100 $\mu\text{L}$ of serum containing ketoprofen. After mixing and centrifugation, the supernatant was collected for further analysis.                                                                                                                                                                                         | The fused silica capillary was filled with a separation buffer: 0.25 M boric acid and 2 M sodium hydroxide (pH 8.9), with addition of acetonitrile and $\beta$ -cyclodextrin. The device was set at 12 kV, 30 $^\circ\text{C}$ , the sample was injected hydrodynamically (99 s with a pressure of 3447.4 Pa). The current in the beginning of the analysis was 35 $\mu\text{A}$ and was increased to 65 $\mu\text{A}$ after the exclusion of acetonitrile, the analysis lasted 12 min. The spectrophotometric absorption UV detector was set at 254 nm. | A simple and rapid method for the determination of ketoprofen in the linear range of 1 to 10 mg/L. The LOD was 0.6 mg/L and LOQ was 1 mg/L. This method is cheaper than HPLC analysis, but it is less sensitive and more affected by the matrix. |

|                                            |                                                                                                                                                                                                                                                                                                 |                                                                                                                                                                                                                                                                                                                                              |                                                                                                                                                                                                                                                                        |
|--------------------------------------------|-------------------------------------------------------------------------------------------------------------------------------------------------------------------------------------------------------------------------------------------------------------------------------------------------|----------------------------------------------------------------------------------------------------------------------------------------------------------------------------------------------------------------------------------------------------------------------------------------------------------------------------------------------|------------------------------------------------------------------------------------------------------------------------------------------------------------------------------------------------------------------------------------------------------------------------|
| High performance liquid chromatography [3] | Plasma containing ketoprofen was mixed with acetonitrile in a ratio of 1:1 in order to separate the protein. This mixture was vortexed for 10 min, centrifuged at 3000 rpm for 10 min. Supernatant was then filtered and then used to produce the desired concentrations of standard solutions. | The separation was carried out isocratically on a Discovery HS C18 column, 5 $\mu\text{m}$ (25 cm $\times$ 4.6 mm). The mobile phase was a mixture of methanol: water (70:30 v/v) with pH = 3.3 (adjusted with phosphoric acid). Sample injection was 20 $\mu\text{L}$ , flow rate was 1 mL/min. The diode array detector was set at 260 nm. | This method illustrated linearity from 0.2441 to 125 $\mu\text{g/mL}$ , with LOD = 0.122 $\mu\text{g/mL}$ and LOQ = 0.2441 $\mu\text{g/mL}$ . It is an easy, quick and cost effective method that can be used in pharmacokinetic studies of ketoprofen.                |
| Developed method                           | Stock solutions of ketoprofen in media extracted three times with diethyl ether in a ratio of 1:1. The obtained organic phase was evaporated, the dry residue was redissolved in 3 mL of mobile phase, then 1 mL of this solution was taken for analysis by HPLC                                | Separation was performed gradient on Shim-pack GIST C18 column (5 $\mu\text{m}$ , Shimadzu) with acetonitrile and miliQ water acidified by 0.1% (v/v) formic acid as the mobile phase at flow rate of 1 mL/min. Injection volume was 50 $\mu\text{L}$ , the analysis lasted 15 min. The diode array detector was set at 254 nm.              | Developed method demonstrated linearity in the range 3 - 100 $\mu\text{g/mL}$ . LOD was determined as 1.20 $\mu\text{g/mL}$ and LOQ was determined as 2.43 $\mu\text{g/mL}$ . It is suited for routine determination of ketoprofen concentration in cultivation media. |

**Table S2.** Detailed table of data for evaluation of the precision of the developed method

| № | EMEM                 |                  | DMEM                 |                  | RPMI                 |                  |
|---|----------------------|------------------|----------------------|------------------|----------------------|------------------|
|   | Retention time (min) | Peak area (mV.s) | Retention time (min) | Peak area (mV.s) | Retention time (min) | Peak area (mV.s) |
| 1 | 3.118                | 9833278          | 3.108                | 7110719          | 3.033                | 3.118            |
| 2 | 3.117                | 9872987          | 3.095                | 7257837          | 3.033                | 3.117            |
| 3 | 3.118                | 9889423          | 3.098                | 7265494          | 3.033                | 3.117            |
|   | <b>Mean (mV.s)</b>   | 9865229.33       | <b>Mean (mV.s)</b>   | 7211350          | <b>Mean (mV.s)</b>   | 11492191         |
|   | <b>SD (mV.s)</b>     | 28865            | <b>SD (mV.s)</b>     | 87233            | <b>SD (mV.s)</b>     | 10493            |
|   | <b>RSD (%)</b>       | 0.29             | <b>RSD (%)</b>       | 1.21             | <b>RSD (%)</b>       | 0.09             |

**Table S3.** Comparison of the composition of used media

| Compounds                                                              | Concentration (mg/L) |       |       |
|------------------------------------------------------------------------|----------------------|-------|-------|
|                                                                        | EMEM                 | DMEM  | RPMI  |
| Glycine                                                                | 0                    | 30    | 10    |
| L-Arginine                                                             | 0                    | 0     | 200   |
| L-Arginine hydrochloride                                               | 126                  | 84    | 0     |
| L-Asparagine                                                           | 0                    | 0     | 50    |
| L-Aspartic acid                                                        | 0                    | 0     | 20    |
| L-Cystine-2HCl                                                         | 31                   | 63    | 65    |
| L-Glutamic acid                                                        | 0                    | 0     | 20    |
| L-Glutamine                                                            | 292                  | 0     | 300   |
| L-Histidine                                                            | 0                    | 0     | 15    |
| L-Histidine hydrochloride-H <sub>2</sub> O                             | 42                   | 42    | 0     |
| L-Hydroxyproline                                                       | 0                    | 0     | 20    |
| L-Isoleucine                                                           | 52                   | 105   | 50    |
| L-Leucine                                                              | 52                   | 105   | 50    |
| L-Lysine hydrochloride                                                 | 73                   | 146   | 40    |
| L-Methionine                                                           | 15                   | 30    | 15    |
| L-Phenylalanine                                                        | 32                   | 66    | 15    |
| L-Proline                                                              | 0                    | 0     | 20    |
| L-Serine                                                               | 0                    | 42    | 30    |
| L-Threonine                                                            | 48                   | 95    | 20    |
| L-Tryptophan                                                           | 10                   | 16    | 5     |
| L-Tyrosine disodium salt dihydrate                                     | 52                   | 104   | 29    |
| L-Valine                                                               | 46                   | 94    | 20    |
| Biotin                                                                 | 0                    | 0     | 0.2   |
| Choline chloride                                                       | 1                    | 4     | 3     |
| D-Calcium pantothenate                                                 | 1                    | 4     | 0.25  |
| Folic acid                                                             | 1                    | 4     | 1     |
| i-Inositol                                                             | 2                    | 7.2   | 35    |
| Niacinamide                                                            | 1                    | 4     | 1     |
| Para-aminobenzoic acid                                                 | 0                    | 0     | 1     |
| Pyridoxal hydrochloride                                                | 1                    | 0     | 0     |
| Pyridoxine hydrochloride                                               | 0                    | 4     | 1     |
| Riboflavin                                                             | 0.1                  | 0.4   | 0.2   |
| Thiamine hydrochloride                                                 | 1                    | 4     | 1     |
| Vitamin B12                                                            | 0                    | 0     | 0.005 |
| Calcium chloride (CaCl <sub>2</sub> ) (anhyd.)                         | 200                  | 200   | 0     |
| Calcium nitrate (Ca(NO <sub>3</sub> ) <sub>2</sub> -4H <sub>2</sub> O) | 0                    | 0     | 100   |
| Ferric nitrate (Fe(NO <sub>3</sub> ) <sub>3</sub> -9H <sub>2</sub> O)  | 0                    | 0.1   | 0     |
| Magnesium sulfate (MgSO <sub>4</sub> ) (anhyd.)                        | 97.67                | 97.67 | 48.84 |
| Potassium chloride (KCl)                                               | 400                  | 400   | 400   |
| Sodium bicarbonate (NaHCO <sub>3</sub> )                               | 2200                 | 3700  | 2000  |
| Sodium chloride (NaCl)                                                 | 6800                 | 6400  | 6000  |
| Sodium phosphate dibasic (Na <sub>2</sub> HPO <sub>4</sub> ) (anhyd.)  | 0                    | 0     | 800   |

|                                                                                 |      |      |      |
|---------------------------------------------------------------------------------|------|------|------|
| Sodium phosphate monobasic (NaH <sub>2</sub> PO <sub>4</sub> -H <sub>2</sub> O) | 140  | 125  |      |
| D-Glucose (dextrose)                                                            | 1000 | 1000 | 2000 |
| Glutathione (reduced)                                                           | 0    | 0    | 1    |
| Phenol red                                                                      | 10   | 10   | 0    |
| Sodium pyruvate                                                                 | 0    | 110  | 0    |

---

### References:

1. P. Stenberg, T. E. Jönsson, B. Nilsson, F. Wollheim, *J. Chromatogr.* 1979, **177**, 145-148.
2. M. Friedberg, Z. K. Shihabi, *J. Chromatogr. B Biomed. Appl.* 1997, **695**, 193-198.
3. F. Zafar, M. H. Shoaib, A. Naz, R. I. Yousuf, H. Ali, *Am. J. Anal. Chem.* 2013, **5**, 6.
